# Supplementary material for: Integrated chromosomal and plasmid sequence analyses reveal diverse modes of carbapenemase gene spread among Klebsiella pneumoniae
Source: PubMed Central journal article supplement (PMC7587227; doi:10.1073/pnas.2003407117), 2020-09-23
Supplement: pnas.2003407117.sapp.pdf [file pnas.2003407117.sapp.pdf]

**Supplementary Appendix of**

**Integrated chromosomal and plasmid sequence  
analyses reveal diverse modes of carbapenemase gene  
spread among *Klebsiella pneumoniae***

Sophia David<sup>1</sup>, Victoria Cohen<sup>1</sup>, Sandra Reuter<sup>2</sup>, Anna Sheppard<sup>3</sup>, Tommaso Giani<sup>4,5</sup>,  
Julian Parkhill<sup>6</sup>, the European Survey of Carbapenemase-Producing *Enterobacteriaceae*  
(EuSCAPE) Working Group<sup>7</sup>, the ESCMID Study Group for Epidemiological Markers  
(ESGEM)<sup>8</sup>, Gian Maria Rossolini<sup>4,5</sup>, Edward J. Feil<sup>9</sup>, Hajo Grundmann<sup>2</sup>, David M.  
Aanensen<sup>1,10</sup>

## Supplementary Tables

**Table S1.** Clustering groups of short-read contigs carrying each of the four carbapenemase genes that have been clustered based on the order and nucleotide similarity of genes surrounding the carbapenemase gene. The gene content of each contig is shown and the carbapenemase gene is highlighted in orange. Some contigs belong to multiple groups (highlighted in yellow) due to being compatible with multiple, usually larger, contigs.

**Table S2.** Context groups of all carbapenemase-encoding isolates. Isolates highlighted in yellow were long-read sequenced. An asterisk indicates isolates in which the carbapenemase gene was detected at low coverage using the raw sequence reads ( $<0.2\times$  the coverage of the multi-locus sequence typing (MLST) gene with the lowest coverage) and that were subsequently excluded from the analysis.

**Table S3.** Long-read sequenced isolates carrying one or more carbapenemase genes from the EuSCAPE collection. Assembly statistics are provided for the hybrid genomes and the replicon types found are shown.

## Supplementary Figures

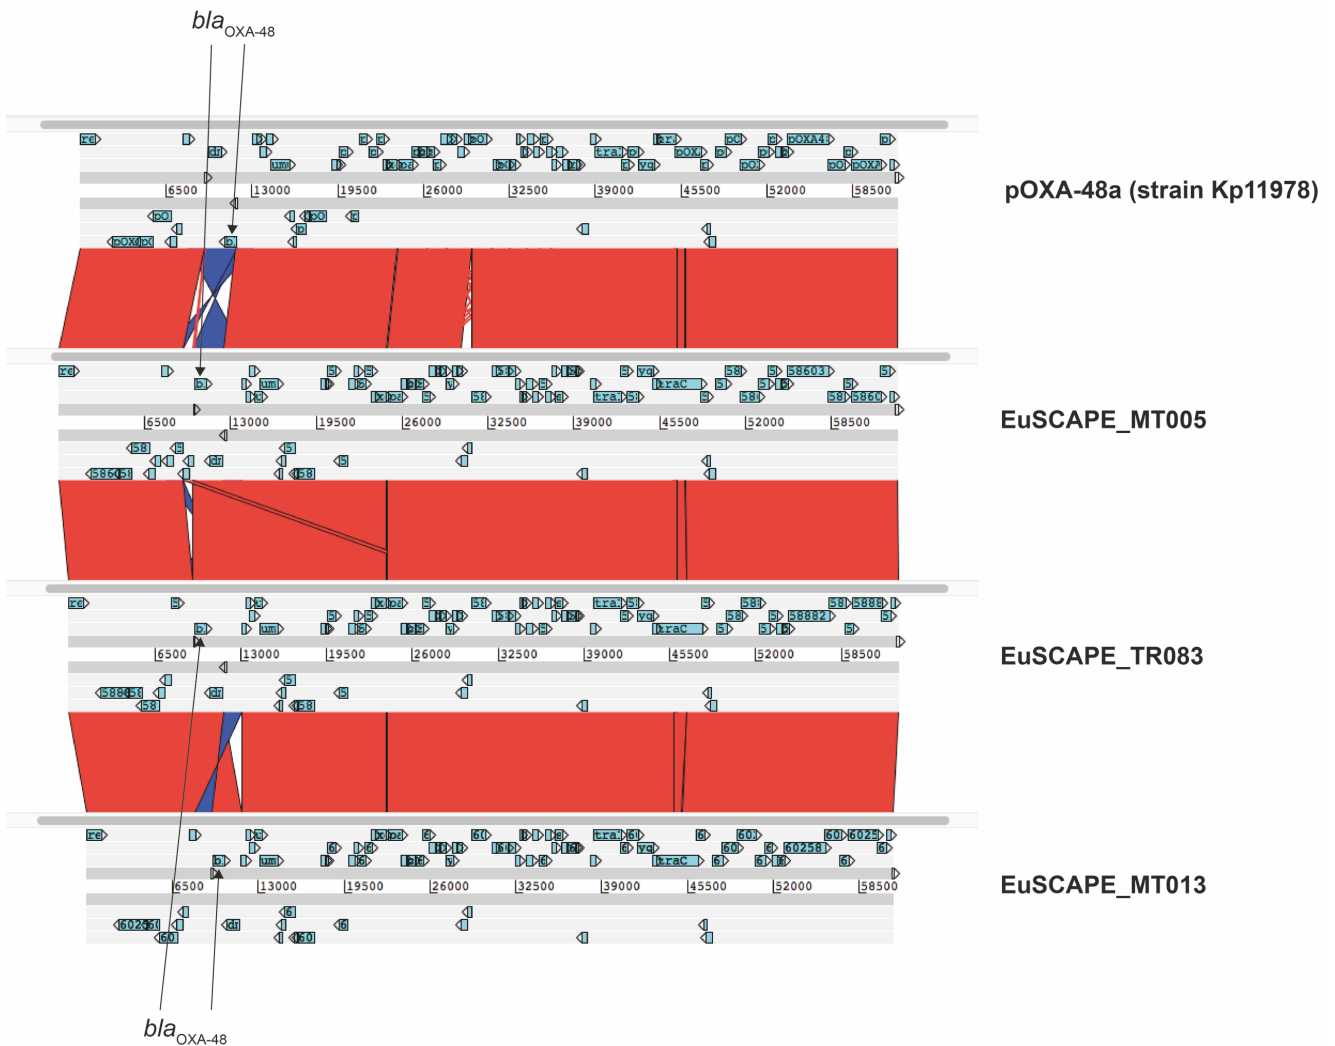

**Supplementary Figure 1. High structural similarity between *bla*<sub>OXA-48</sub>-like-carrying pOXA-48-like plasmids.** A comparison with the Artemis Comparison Tool (ACT) shows the high structural homology between pOXA-48a (Poirel et al. 2012) and plasmids from the hybrid assemblies of EuSCAPE\_MT005 (circularised), EuSCAPE\_TR083 (circularised) and EuSCAPE\_MT013 (non-circularised). Sections of similarity of  $\geq 500$ bp are shown.

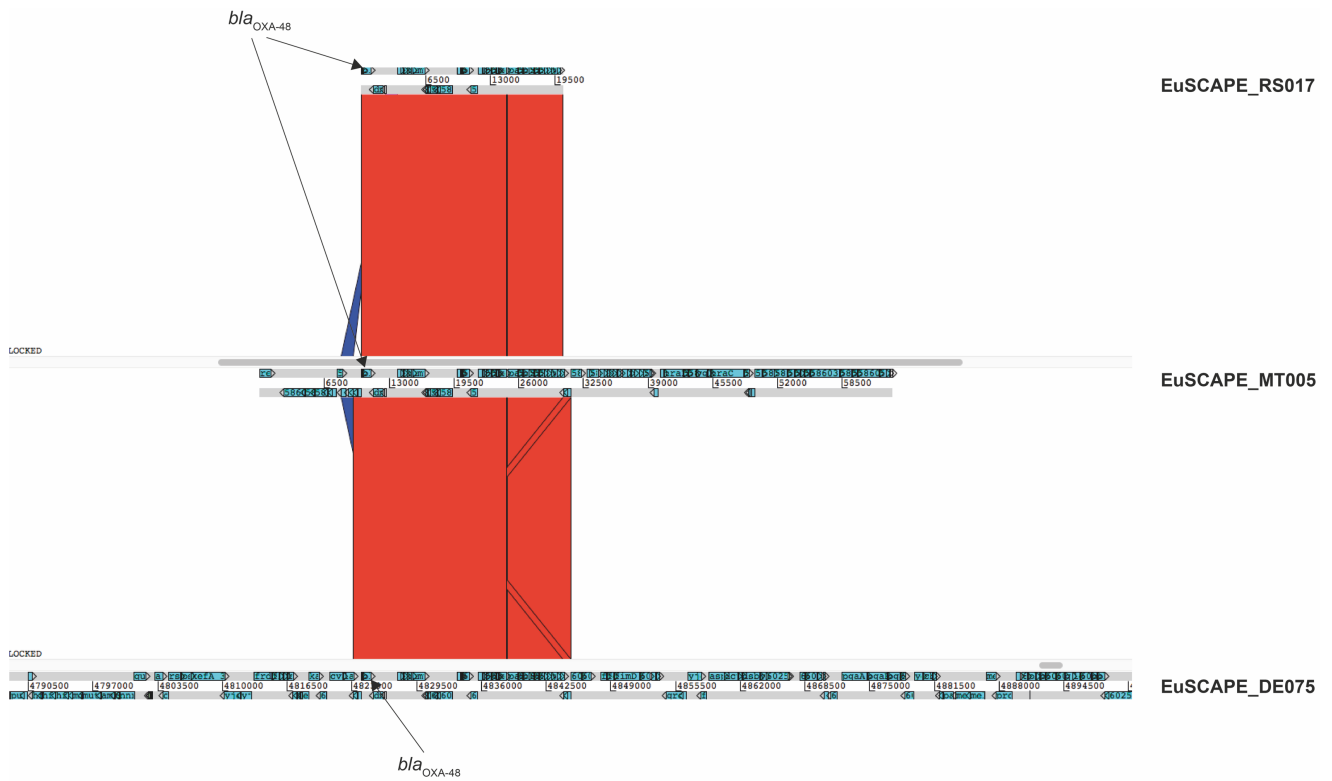

**Supplementary Figure 2. Integration of the Tn6237 transposon carrying *bla*<sub>OXA-48</sub> into the chromosome.** A comparison with the Artemis Comparison Tool (ACT) shows the homology between different vectors of *bla*<sub>OXA-48</sub>. From top to bottom are the 20.3kb non-circularised putative plasmid sequence from EuSCAPE\_RS017 which represents the Tn6237 transposon, the 63.5kb circularised putative plasmid sequence from EuSCAPE\_MT005 which represents a full-length pOXA-48-like plasmid, and a section of the chromosomal sequence of EuSCAPE\_DE075 into which the *bla*<sub>OXA-48</sub> gene has integrated. Sections of similarity of  $\geq 500$ bp are shown.

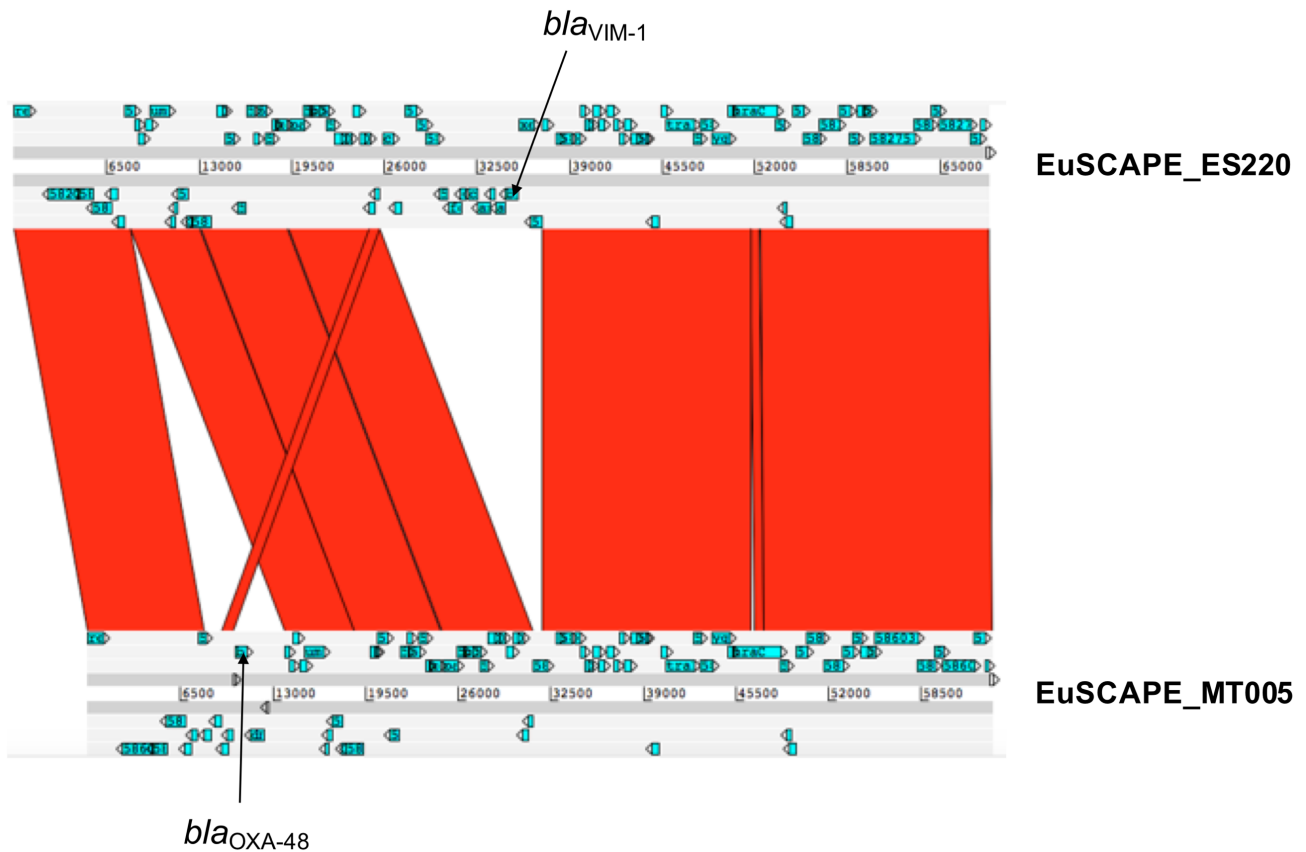

**Supplementary Figure 3. Integration of *bla*<sub>VIM-1</sub> into the pOXA-48-like plasmid.** A comparison with the Artemis Comparison Tool (ACT) between the *bla*<sub>VIM-1</sub>-carrying plasmid from EuSCAPE\_ES220 and the *bla*<sub>OXA-48</sub>-carrying (pOXA-48-like) plasmid from EuSCAPE\_MT005 shows high structural homology, with differences only in the presence/absence of mobile regions carrying *bla*<sub>OXA-48</sub> and *bla*<sub>VIM-1</sub>. Both plasmids could be circularised. Sections of similarity of ≥500bp are shown.

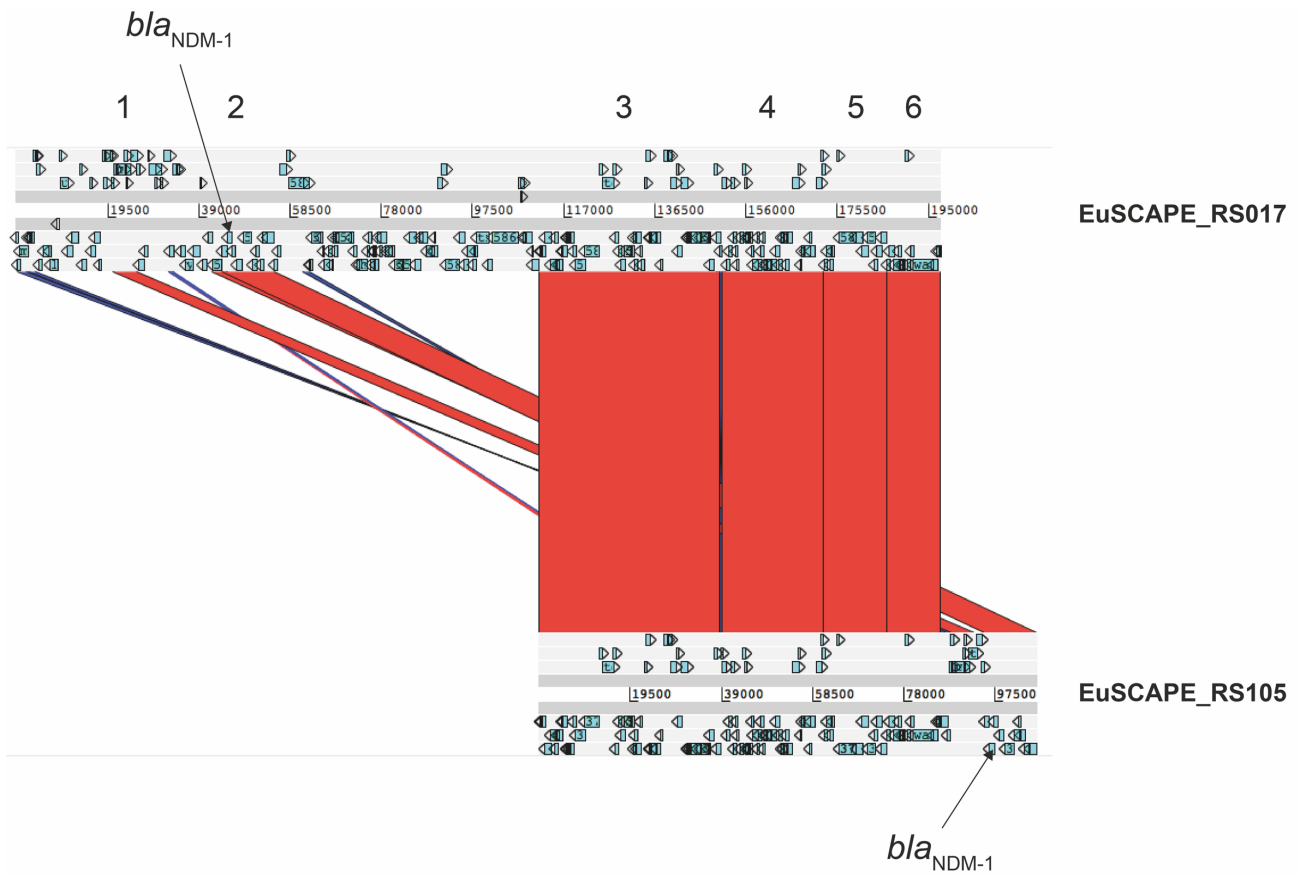

**Supplementary Figure 4. Recent shared ancestry between *bla*<sub>NDM-1</sub>-carrying plasmids from ST274 and ST101.** A comparison is shown between the *bla*<sub>NDM-1</sub>-carrying plasmids from EuSCAPE\_RS105 (ST274) and EuSCAPE\_RS017 (ST101) that harbour an IncA/C2 replicon and both IncA/C2 and IncR replicons, respectively. Neither plasmid could be circularised. The nucleotide similarity across six major shared regions is high, as demonstrated by the number of bases and SNPs found in each: 1) 4,958bp, 1 SNP; 2) 11,180bp, 1 SNP; 3) 38,626bp, 1 SNP; 4) 21,560, 0 SNPs; 5) 13,600bp, 0 SNPs; 6) 11,500bp, 0 SNPs.

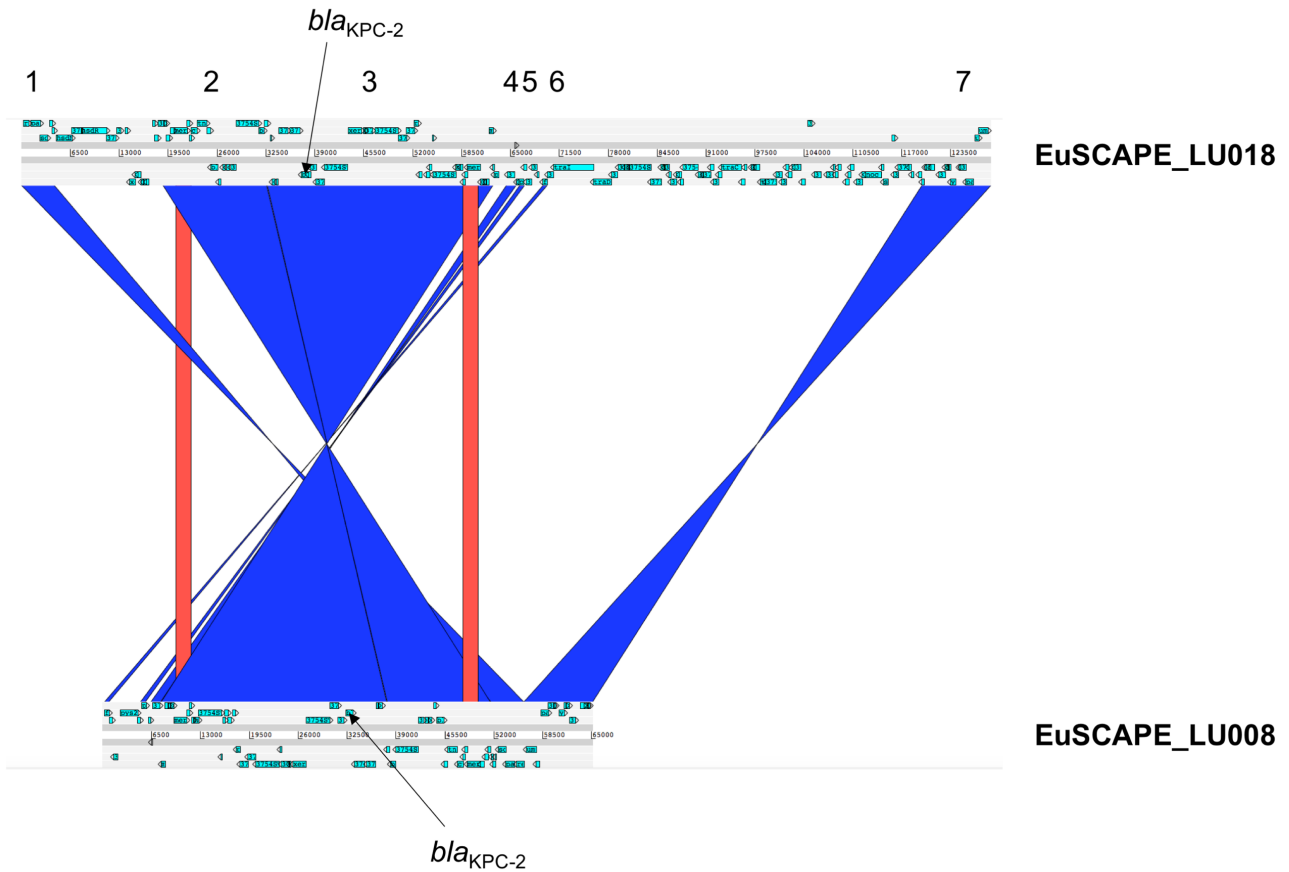

**Supplementary Figure 5. Evidence for recent common ancestry between two plasmids obtained from isolates of different STs but from the same hospital.** A comparison with the Artemis Comparison Tool (ACT) between the *bla*<sub>KPC-2</sub>-carrying plasmid sequences from EuSCAPE\_LU018 (circularised) and EuSCAPE\_LU008 (non-circularised) shows seven regions of shared sequence ( $\geq 500$ bp). The nucleotide similarity across these regions differs substantially (suggestive of different divergence times), as demonstrated by the number of bases and SNPs found in each: 1) 4,374bp, 0 SNPs; 2) 13,741bp, 0 SNPs; 3) 30,013bp, 0 SNPs; 4) 1,286bp, 25 SNPs; 5) 693bp, 44 SNPs; 6) 563bp, 26 SNPs; 7) 9,174bp, 0 SNPs.

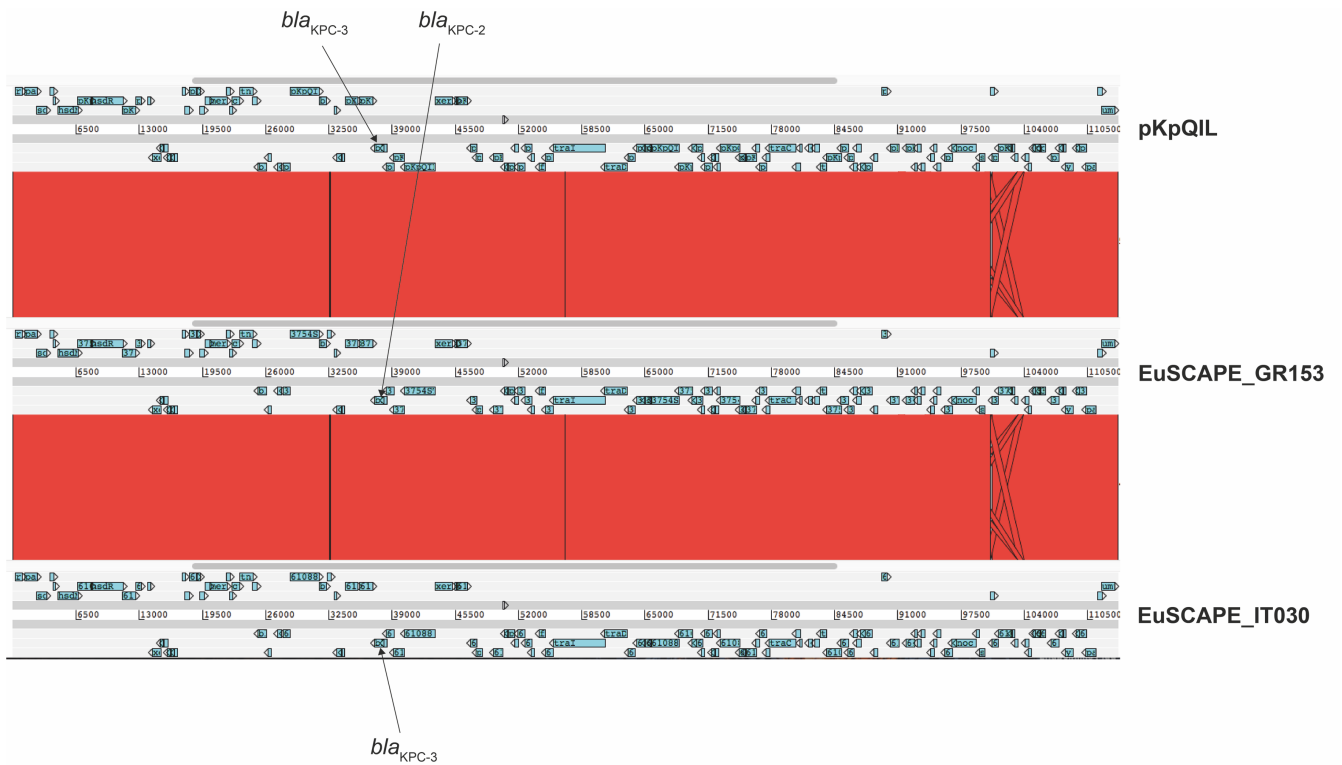

**Supplementary Figure 6. High structural similarity between  $bla_{KPC}$ -carrying pKpQIL-like (backbone I) plasmids.** A comparison with the Artemis Comparison Tool (ACT) shows the high structural homology between pKpQIL (Leavitt et al. 2010) and circularised plasmids from EuSCAPE\_GR153 and EuSCAPE\_IT030. Sections of similarity of  $\geq 500$ bp are shown.



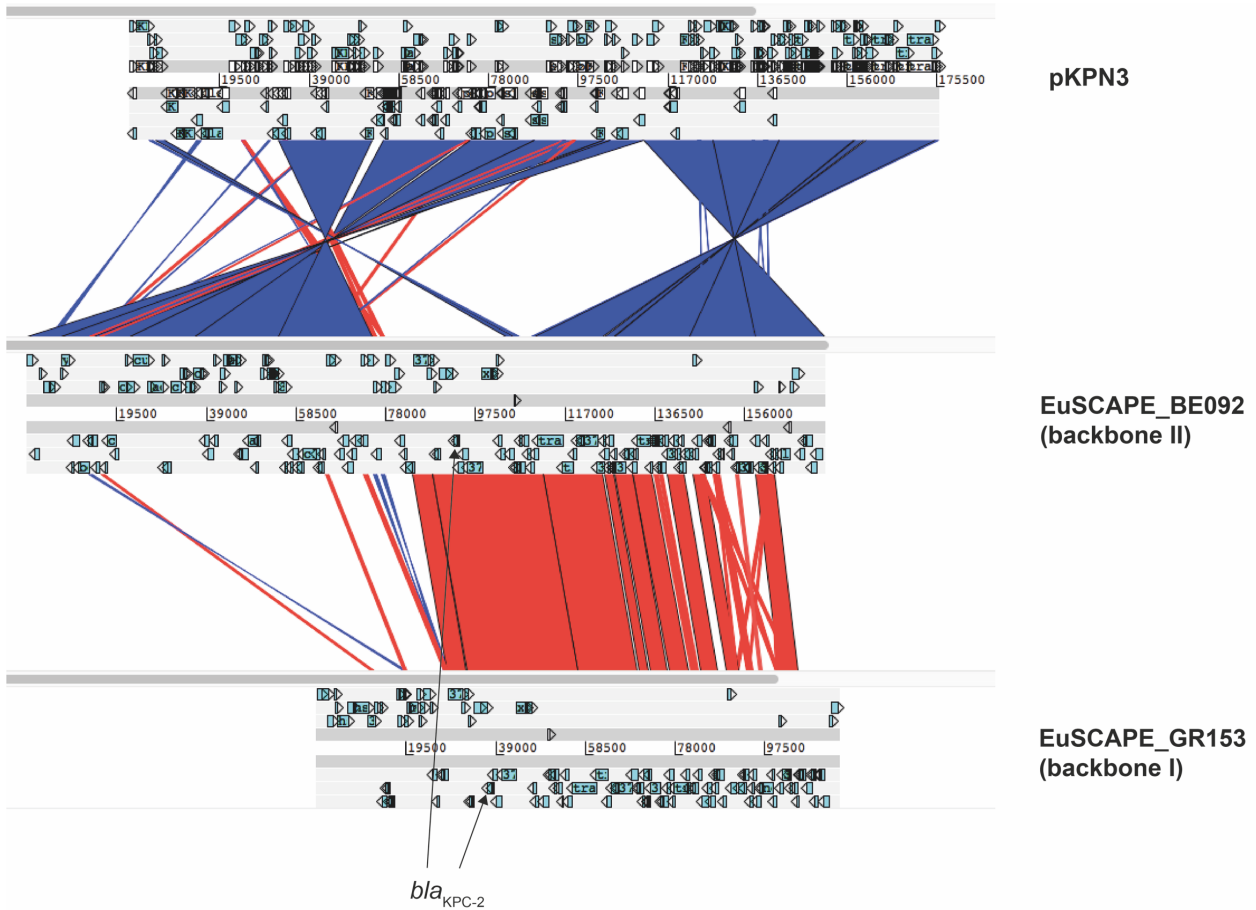

**Supplementary Figure 7. Partial sequence homology between pKPN3 and IncF plasmid backbones I and II that carry *bla*<sub>KPC</sub>. A comparison with the Artemis Comparison Tool (ACT) between pKPN3 (accession number, CP000648) and the circularised *bla*<sub>KPC-2</sub>-carrying plasmids of EuSCAPE\_GR153 (backbone I) and EuSCAPE\_BE092 (backbone II) is shown. Sections of similarity of  $\geq 500$ bp are shown.**

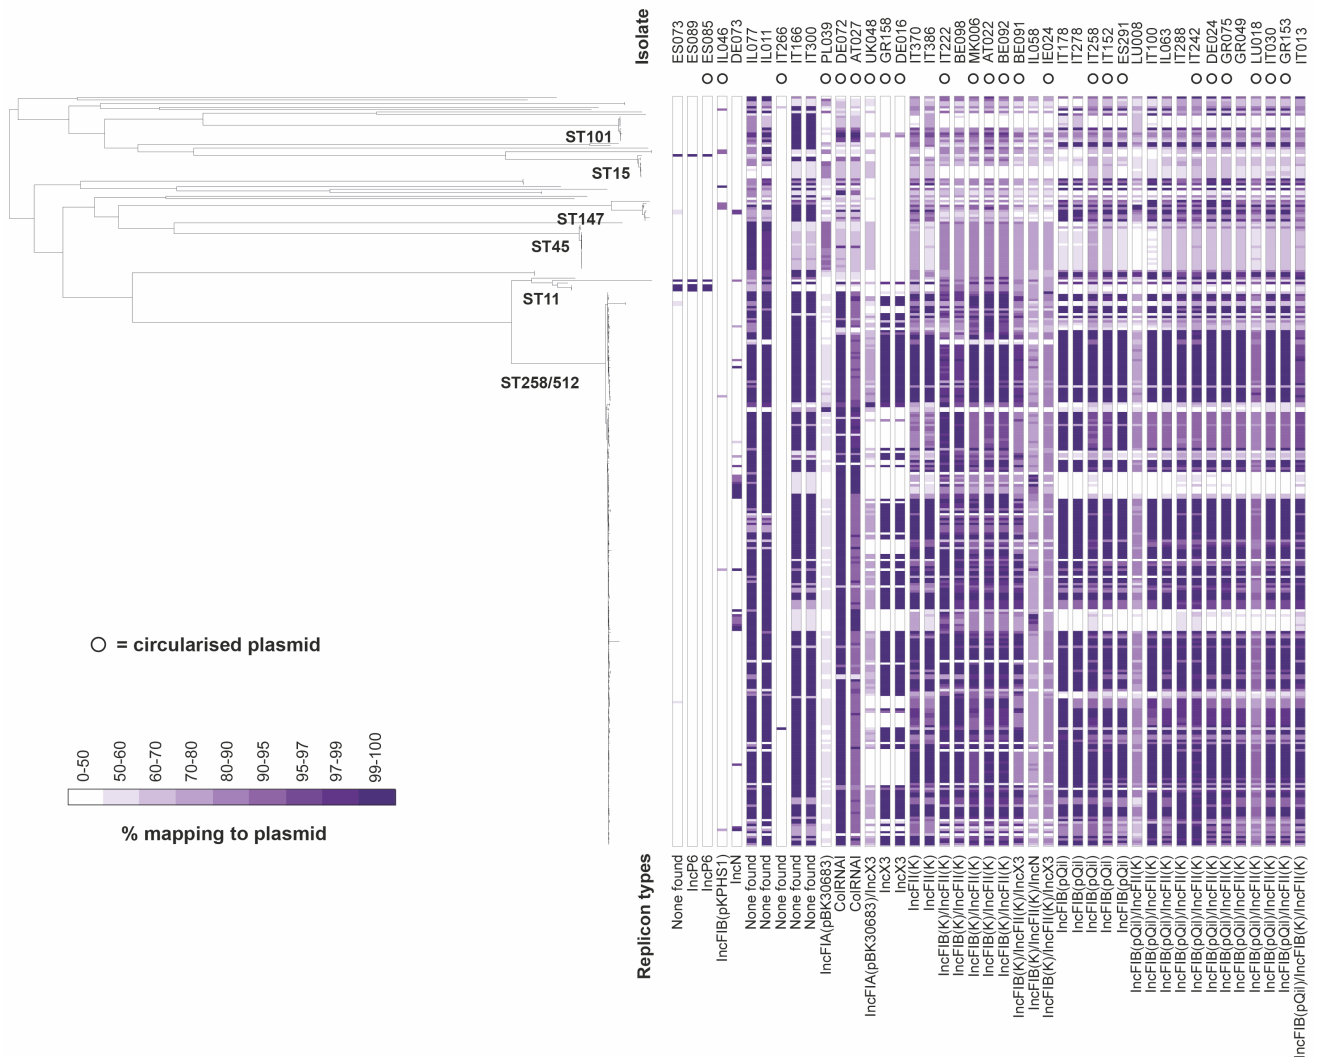

**Supplementary Figure 8. Isolates carrying *bla*<sub>KPC</sub> genes frequently carry two or more of the different plasmid types found to harbour *bla*<sub>KPC</sub> genes in the hybrid assemblies.** The phylogenetic tree shows 311 *bla*<sub>KPC</sub>-carrying *K. pneumoniae sensu stricto* isolates (the *bla*<sub>KPC</sub>-carrying isolate from *K. variicola* is excluded). The tree was constructed using SNPs in the core genome and is midpoint rooted. All non-*bla*<sub>KPC</sub>-carrying isolates, which would be interspersed amongst the isolates here, were also excluded. The columns show the percentage lengths of each of the 43 *bla*<sub>KPC</sub>-carrying putative plasmid sequences found in the hybrid assemblies that were mapped by the short reads of the 311 *bla*<sub>KPC</sub>-carrying isolates (note the non-linear colour gradient). Plasmid sequences that could be circularised are indicated with a circle at the top of the column. The replicon types found in each of the plasmid sequences are indicated at the bottom.

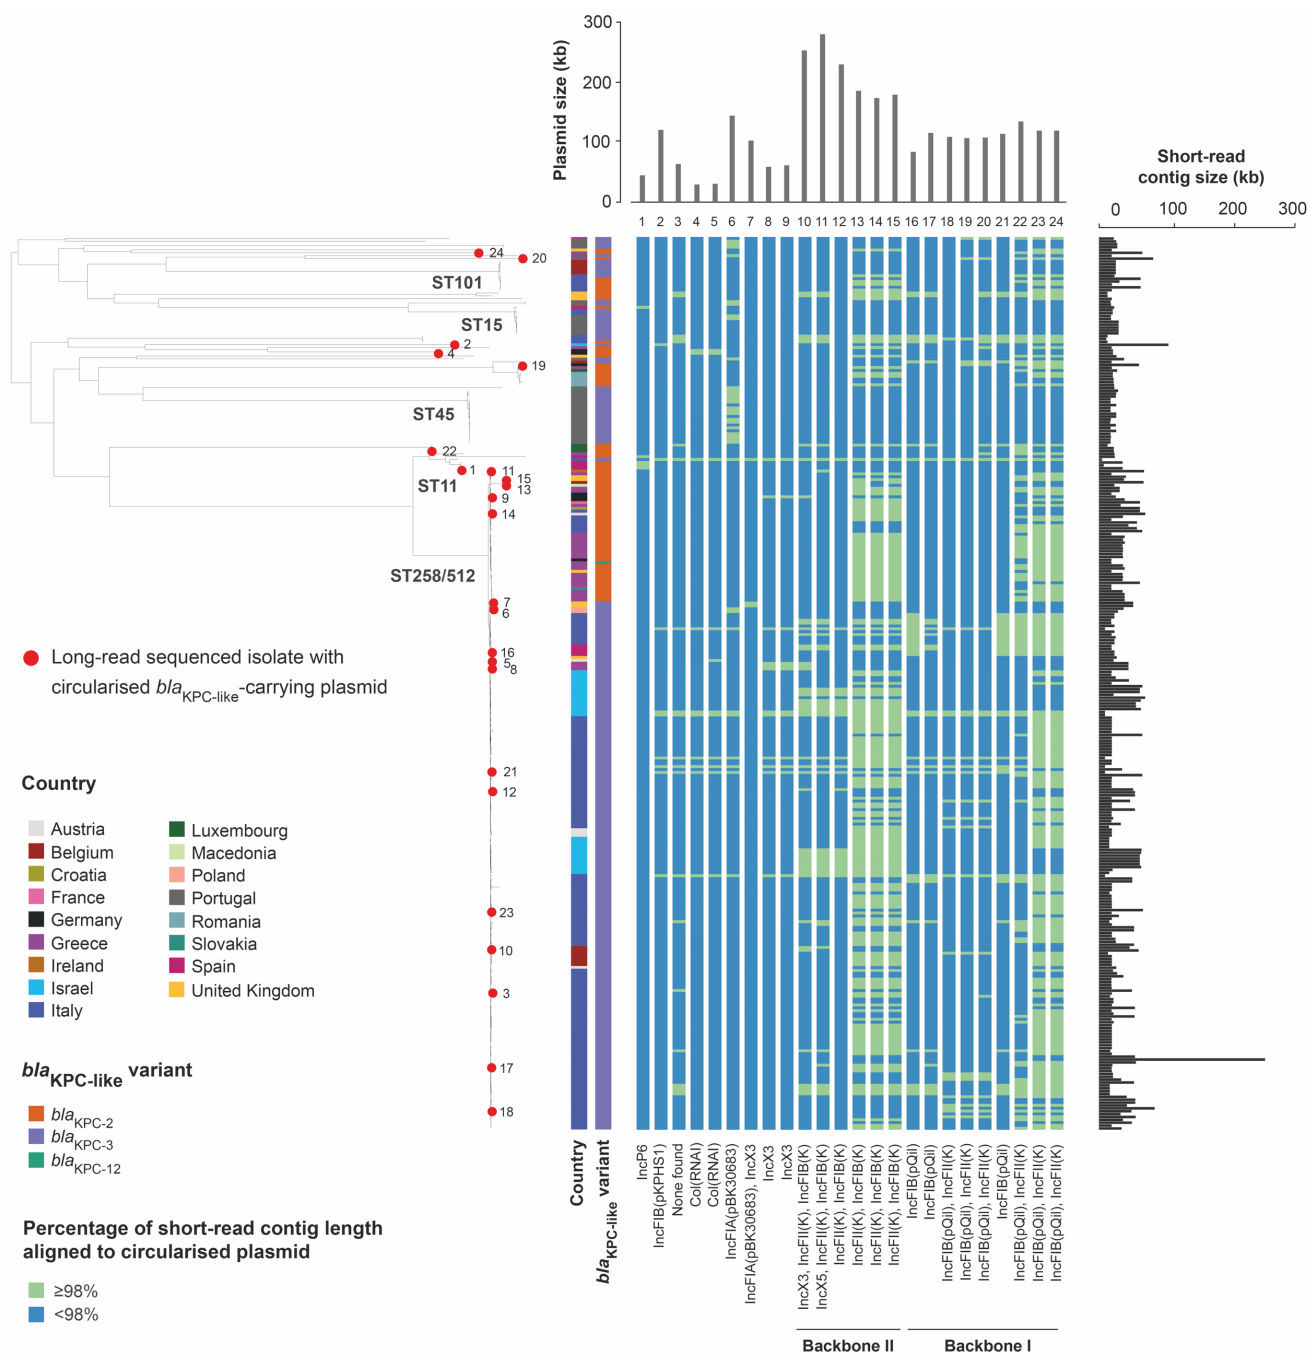

**Supplementary Figure 9. Most *bla<sub>KPC</sub>*-carrying contigs from the short-read assemblies are compatible with belonging to IncF backbone I and II plasmids only.** The phylogenetic tree contains 311 *bla<sub>KPC</sub>*-carrying *K. pneumoniae sensu stricto* isolates (the *bla<sub>KPC</sub>*-carrying isolate from *K. variicola* is excluded). The tree was constructed using SNPs in the core genome and is midpoint rooted. All non-*bla<sub>KPC</sub>*-carrying isolates, which would be interspersed amongst the isolates here, were also excluded. Twenty-four isolates from which circularised *bla<sub>KPC</sub>*-carrying plasmids were obtained are marked by red circles in the tree and numbered.

The columns, from left to right, show the country of isolation, the *bla*<sub>KPC</sub> variant, and whether the short-read assembly contigs carrying *bla*<sub>KPC</sub> are compatible with each of the 24 complete plasmids (i.e.  $\geq 98\%$  of the contig aligns to the plasmid using NUCmer). The latter columns are numbered according to the isolate from which each plasmid was recovered from in the phylogenetic tree (and in the same order as in the matrix of Figure 3). The length of the circularised plasmids and the short-read assembly contigs are shown.

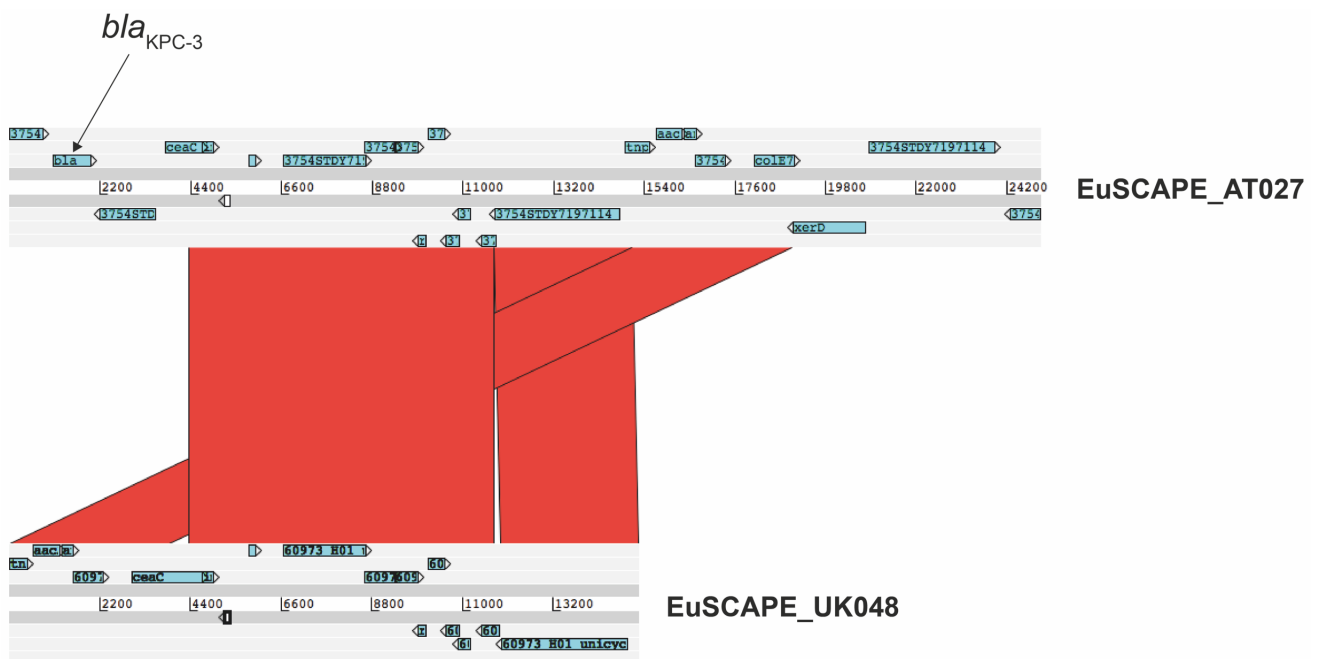

**Supplementary Figure 10. Structural homology of CoIRNAI plasmids with and without *bla*<sub>KPC</sub> genes.** The structural similarity between the *bla*<sub>KPC-3</sub>-carrying plasmid sequence from EuSCAPE\_AT027 and non-*bla*<sub>KPC</sub>-carrying plasmid sequence from EuSCAPE\_UK048 is visualized using the Artemis Comparison Tool (ACT). Both plasmids could be circularised. Sections of similarity of  $\geq 500$ bp are shown.

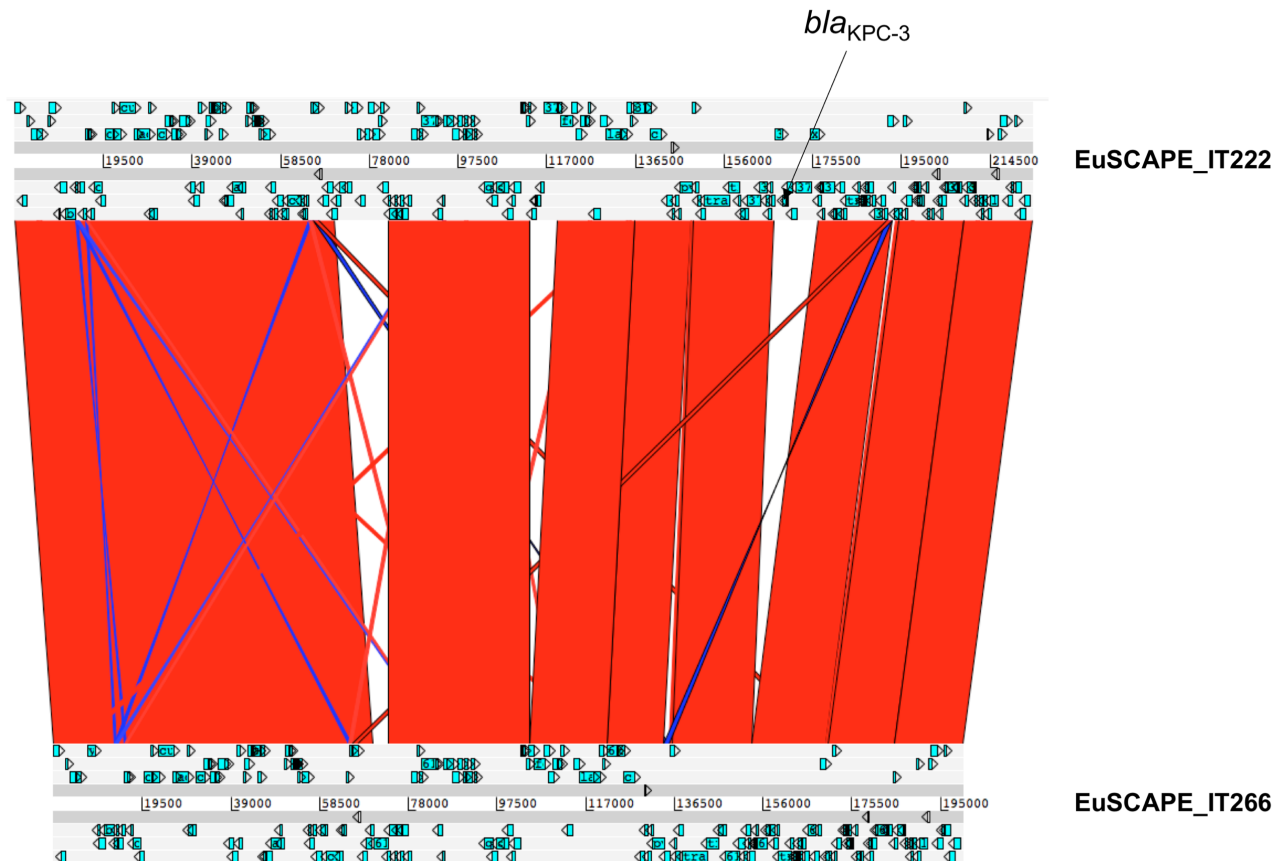

**Supplementary Figure 11. Structural homology of backbone II (IncFIB(K)/IncFII(K)) plasmids with and without *bla*<sub>KPC</sub> genes.** The structural similarity between the *bla*<sub>KPC-3</sub>-carrying plasmid sequence from EuSCAPE\_IT222 and non-*bla*<sub>KPC</sub>-carrying plasmid sequence from EuSCAPE\_IT266 is visualized using the Artemis Comparison Tool (ACT). Both plasmids could be circularised. Sections of similarity of  $\geq 500$ bp are shown.

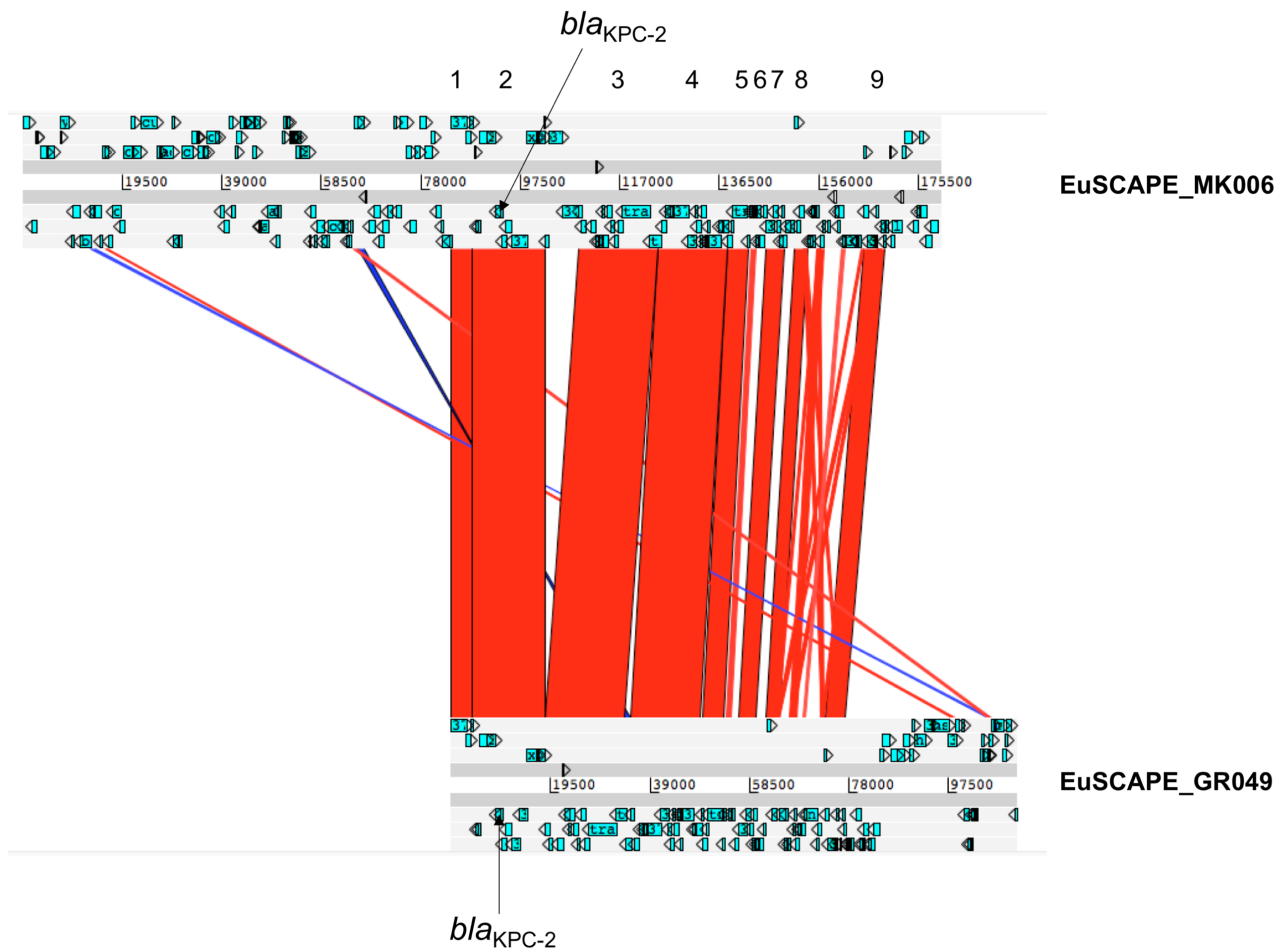

**Supplementary Figure 12. High nucleotide similarity over 34kb between two plasmids representing backbones I and II suggests recombination involving the *bla*<sub>KPC</sub> gene.** The structural similarity between the *bla*<sub>KPC-2</sub>-carrying plasmid sequences from EuSCAPE\_GR049 (non-circularised) and EuSCAPE\_MK006 (circularised) is visualized using the Artemis Comparison Tool (ACT). These are from closely-related isolates and represent backbones I and II of the *bla*<sub>KPC</sub>-carrying plasmids, respectively. Sections of similarity of  $\geq 500$ bp are shown. High nucleotide similarity was found in three of nine highlighted shared regions which comprise a total of 34kb. The total number of bases and SNPs found in the nine regions are: 1) 4059bp, 0 SNPs; 2) 14,293bp, 2 SNPs; 3) 15,671bp, 0 SNPs; 4) 13,574bp, 53 SNPs; 5) 4150bp, 109 SNPs; 6) 1012bp, 75 SNPs; 7) 3600bp, 91 SNPs; 8) 2606bp, 58 SNPs; 9) 3986bp, 61 SNPs.

## Supplementary Results

### Inferring a chromosomal or plasmid origin of contigs in the hybrid assemblies

11/79 (13.9%) putative plasmid sequences carrying carbapenemase genes in the hybrid assemblies could be neither circularised nor contained plasmid replicons. Visualisation of the assembly graphs using Bandage (Wick et al. 2015) suggested that 10/11 belong to plasmids since they connect with other non-chromosomal contigs. Furthermore, we found 4/11 were from hybrid assemblies with a circularised chromosomal sequence, which lends support to a plasmid origin of the remaining smaller sequences. We also investigated whether we could use sequencing coverage of the carbapenemase genes from the short-read data to infer their origin. We found that the short-read coverage of 41 carbapenemase genes found on circularised contig sequences in the hybrid assemblies with known plasmid replicons (i.e. sequences that we were highly confident represented plasmids) was highly variable relative to multi-locus sequence typing (MLST) genes (0.3x–27.8x) and had a median value of 1.7x. The median coverage (relative to MLST genes) of the five carbapenemase genes found on chromosomal sequences was identical to this, although the values were less variable (1.4–1.9x). These results suggest that high coverage of a carbapenemase gene may indicate a plasmid origin but low coverage could represent either a plasmid or chromosomal origin. Based on this, we assumed a plasmid origin for 4/11 of the putative plasmid sequences that had  $\geq 3x$  coverage of the carbapenemase (relative to MLST genes) in the short-read data. Only one of these overlapped with the four associated with a circularised chromosome.

### Comparison of IncL/M(pOXA48) plasmids with pOXA-48a

Using NUCmer (Kurtz et al. 2004), we found 0–4 SNPs between three IncL/M(pOXA48) plasmids carrying *bla*<sub>OXA-48</sub> that were obtained from hybrid assemblies (EuSCAPE\_MT013, EuSCAPE\_MT005, EuSCAPE\_TR083). We found 128 SNPs between each of these three plasmids and the previously published plasmid, pOXA-48a (Poirel et al. 2012). Most of these SNPs were highly clustered, suggesting that they have been introduced

by recombination. The four plasmids showed high structural homology using the Artemis Comparison Tool (ACT) (Carver et al. 2005) (**Supplementary Figure 1**).

### **Most *bla*<sub>OXA-48-like</sub>-carrying plasmids were found rarely**

Using short-read mapping to *bla*<sub>OXA-48-like</sub>-carrying plasmids obtained from the hybrid assemblies, we found that the ColKP3, IncX3, IncL/M(pMU407) and IncA/C2 plasmid sequences were found only rarely amongst the 249 *bla*<sub>OXA-48-like</sub>-carrying isolates (**Figure 1A**). In total, 6 (2.4%), 3 (1.2%), 3 (1.2%) and 1 (0.4%) isolate(s), including the long-read sequenced isolates themselves, had mapping across  $\geq 99\%$  of each of the four plasmid types, respectively. These numbers only increased to 6 (2.4%), 3 (1.2%), 12 (4.8%) and 16 (6.4%) when the mapping threshold was lowered from  $\geq 99\%$  to  $\geq 90\%$ .

### **Chromosomal integration of *bla*<sub>OXA-48</sub> genes**

We found *bla*<sub>OXA-48</sub> within the chromosome of three hybrid assemblies recovered from two closely-related ST11 isolates (EuSCAPE\_ES046 and EuSCAPE\_ES089) and one ST530 isolate (EuSCAPE\_DE075). Within all three chromosomes, *bla*<sub>OXA-48</sub> was found within a ~20kb composite transposon, Tn6237, which also carried *bla*<sub>OXA-48</sub> in pOXA-48-like plasmids (**Supplementary Figure 2**). The Tn6237 transposon (carrying *bla*<sub>OXA-48-like</sub>) was found in the same chromosomal location in both ST11 assemblies, indicative of a single integration event. We also found direct repeat sequences (CAACCGGCA – EuSCAPE\_ES046/EuSCAPE\_ES089; CGCTCGAG – EuSCAPE\_DE075) immediately upstream and downstream of each transposon sequence, which likely facilitate integration.

To further confirm the chromosomal integration of *bla*<sub>OXA-48</sub> in these three isolates, we mapped their long reads to the chromosome from each of their own hybrid assemblies. We found reads bridging the junction between the chromosomal sequence and integrated Tn6237 transposon, supporting chromosomal integration. By contrast, when the long reads of isolates with full-length pOXA-48-like plasmids were mapped to the chromosomes of EuSCAPE\_ES046, EuSCAPE\_ES089 and EuSCAPE\_DE075, we found an absence of reads spanning the chromosome/transposon junction.



Using the short-read sequence data, we also found evidence of other closely-related isolates carrying *bla*<sub>OXA-48</sub> genes within the chromosome. Two of the three isolates with a chromosomally integrated *bla*<sub>OXA-48</sub> gene in the hybrid assembly, EuSCAPE\_ES046 and EuSCAPE\_ES089, belonged to a clade of eight closely-related *bla*<sub>OXA-48</sub>-carrying ST11 isolates submitted from three different hospitals in Madrid, Spain. The short sequence reads of all eight of these isolates mapped to 100% of the Tn6237 transposon. However, they mapped to various extents (36.3-100%) of the full-length 63.5kb pOXA-48-like plasmid from EuSCAPE\_MT005 (i.e. with at least one read per base) (**Figure 1A**). In particular, short reads from EuSCAPE\_ES046 and EuSCAPE\_ES089 mapped to 47.3% and 94.5% of the 63.5kb epidemic plasmid, respectively, suggesting that they had retained additional pOXA-48-like plasmid sequence despite integration of the Tn6237 transposon into the chromosome. However, we inspected the mapped sequence reads of all eight isolates to the 63.5kb plasmid using Artemis (Carver et al. 2012), and found that 7/8 isolates had high (>50x) and even coverage across the ~20kb Tn6237 region, but either no or very low coverage of reads (typically <5x) across the remaining sequence. This supports chromosomal integration of *bla*<sub>OXA-48</sub> in these isolates. However, one isolate, EuSCAPE\_ES068, had even coverage (~200x) across the entire pOXA-48-like plasmid, suggesting it still possessed an independent full-length plasmid.

The third hybrid assembly with a chromosomally-integrated *bla*<sub>OXA-48</sub> gene is from EuSCAPE\_DE075, which belonged to a clade of three closely-related ST530 isolates. We found that, in addition to EuSCAPE\_DE075, another of these also may have carried *bla*<sub>OXA-48</sub> within the chromosome. Short-read mapping showed that it possessed the full ~20kb Tn6237 sequence, but only 46.0% of the 63.5kb pOXA-48-like plasmid sequence.

Finally, we also found that a 20.3kb non-circularised putative plasmid sequence carrying *bla*<sub>OXA-48</sub> from the hybrid assembly of EuSCAPE\_RS017 (ST101) represented the Tn6237 transposon. Another 24.9kb of sequence from the pOXA-48-like plasmid which contains the IncL/M(pOXA48) replicon was found in the same assembly on a different contig. Thus the pOXA-48-like plasmid may have been present in this isolate although there could also have been recent movement of Tn6237 out of the plasmid, resulting in the separate 20.3kb fragment.

## Integration of *bla*<sub>VIM-1</sub> into a pOXA-48-like plasmid

Amongst the hybrid assemblies, we found a 68.4kb IncL/M(pOXA48) plasmid carrying *bla*<sub>VIM-1</sub>. This was recovered from a ST483 isolate, EuSCAPE\_ES220. The plasmid had an identical backbone structure to pOXA-48-like plasmids, except for a deletion of the 4.9kb Tn1999 region containing *bla*<sub>OXA-48</sub> and insertion of a 12.2kb Tn21 region containing *bla*<sub>VIM-1</sub> at a different location (**Supplementary Figure 3**). Short sequence reads from a further four *bla*<sub>VIM-1</sub>-carrying isolates, none of which carried a *bla*<sub>OXA-48-like</sub> gene, also mapped to the full length of the 68.4kb *bla*<sub>VIM-1</sub>-carrying plasmid. These comprised another ST483 isolate that was very closely related to EuSCAPE\_ES220, as well as one ST11 and two ST15 isolates.

We next determined the evolutionary relationships between pOXA48-like plasmids carrying *bla*<sub>OXA-48</sub> and *bla*<sub>VIM-1</sub> genes. We mapped the short sequence reads of EuSCAPE\_ES220, together with those from the other four *bla*<sub>VIM-1</sub>-carrying isolates, to the *bla*<sub>OXA-48</sub>-carrying plasmid from EuSCAPE\_MT005. Combined phylogenetic analyses of these with all other pOXA-48-like plasmids carrying *bla*<sub>OXA-48-like</sub> genes showed that four of the five (putative) *bla*<sub>VIM-like</sub>-carrying plasmids cluster monophyletically (including EuSCAPE\_ES220) (**Figure 1B**). These four mapped plasmid sequences have pairwise SNP differences of 0-1. Together, these results further support the presence of *bla*<sub>VIM-1</sub> on the pOXA-48-like plasmid backbone for three of the non-long-read sequenced isolates (1 x ST483, 2 x ST15). It also suggests that integration of the 12.2kb region carrying *bla*<sub>VIM-1</sub> occurred once in a common ancestor of the four monophyletic plasmid sequences, and that the plasmid has since spread horizontally at least once (i.e. between ST15 and ST483). The fifth putative *bla*<sub>VIM-1</sub>-carrying plasmid sequence from an ST11 isolate differs from these by 58-59 SNPs, and is also more related to other pOXA-48-like plasmid sequences harbouring *bla*<sub>OXA-48-like</sub> genes. This suggests that if *bla*<sub>VIM-1</sub> is on a pOXA-48-like backbone in this isolate, the gene integrated on a separate occasion.

## Comparison of *bla*<sub>KPC</sub>-carrying plasmids from isolates belonging to different STs but submitted from the same hospital

We generated hybrid assemblies for two isolates (EuSCAPE\_LU018, EuSCAPE\_LU008) belonging to the same *bla*<sub>KPC</sub> genetic context group. This was to investigate possible plasmid transfer since they were submitted from the same hospital but

belonged to different STs. We obtained a 128.8kb circularised plasmid from EuSCAPE\_LU018 and a non-circularised 65.1kb plasmid from EuSCAPE\_LU008, which carried *bla*<sub>KPC</sub> genes. Both were backbone I plasmids harbouring IncFII(K) and IncFIB(pQIL) replicons. A comparison with the Artemis Comparison Tool (Carver et al. 2005) showed structural rearrangements between the two (**Supplementary Figure 5**). Despite this, we found 0 SNPs across 95.8% of the total shared sequence. This is suggestive of a recent common ancestor and therefore of possible plasmid exchange within the hospital.

### **Comparison of short-read contigs from ST258/512 isolates with circularised *bla*<sub>KPC</sub>-carrying plasmids**

To infer the plasmid type that short-read contigs carrying *bla*<sub>KPC</sub> genes ( $n=312$ ) were most likely derived from, we used NUCmer (Kurtz et al. 2004) to compare them to each of 24 circularised *bla*<sub>KPC</sub>-carrying plasmids from the hybrid assemblies. NUCmer allows for structural rearrangements such as insertion of Tn4401 at different locations in the same plasmid. Upon testing of this approach, we found that 98.3-100% of the sequence in each short-read contig could be aligned to the complete *bla*<sub>KPC</sub>-carrying plasmid from the same isolate (although in many cases to other *bla*<sub>KPC</sub>-carrying plasmids too). For all other comparisons, we thus required  $\geq 98\%$  of the short-read contig sequence to be aligned to a complete *bla*<sub>KPC</sub>-carrying plasmid for it to be deemed a match.

### **Sequence comparisons of ColRNAI and backbone II plasmids with and without *bla*<sub>KPC</sub> genes**

To infer whether *bla*<sub>KPC</sub>-carrying plasmids are being imported from outside of the ST258/512 lineage, or whether they result from mobilisation of *bla*<sub>KPC</sub> onto existing plasmids, we compared plasmids of the same type with and without *bla*<sub>KPC</sub> genes. First, we compared two ColRNAI plasmids, with and without *bla*<sub>KPC</sub>, from EuSCAPE\_AT027 and EuSCAPE\_UK048, respectively. We found high structural homology and 0 SNPs across the entire aligned sequence (**Supplementary Figure 10**). Second, we compared two backbone II plasmids, with and without *bla*<sub>KPC</sub>, from EuSCAPE\_IT222 and EuSCAPE\_IT266,

respectively. We found three SNPs over 195.9kb of aligned sequence, as well as three insertions (including of Tn4401) in the first plasmid relative to the second (**Supplementary Figure 11**). The overall high conservation between these plasmid pairs supports movement of *bla*<sub>KPC</sub> onto pre-existing plasmids in these cases.

## References

1. Poirel L, Bonnin RA, Nordmann P. Genetic features of the widespread plasmid coding for the carbapenemase OXA-48 (2012) *Antimicrob Agents Chemother* 56(1):559-62.
2. Leavitt A, Chmelnitsky I, Carmeli Y, Navon-Venezia S (2010). Complete nucleotide sequence of KPC-3-encoding plasmid pKpQIL in the epidemic *Klebsiella pneumoniae* sequence type 258. *Antimicrob Agents Chemother* 54(10):4493-6.
3. Wick RR, Schultz MB, Zobel J, Holt KE (2015) Bandage: interactive visualization of de novo genome assemblies. *Bioinformatics* 31(20):3350-2.
4. Kurtz S, Phillippy A, Delcher AL, Smoot M, Shumway M, Antonescu C, et al (2004) Versatile and open software for comparing large genomes. *Genome Biology* 5(2).
5. Carver TJ, Rutherford KM, Berriman M, Rajandream MA, Barrell BG, Parkhill J (2005) ACT: the Artemis comparison tool. *Bioinformatics* 21(16):3422-3.
6. Carver T, Harris SR, Berriman M, Parkhill J, McQuillan JA (2012) Artemis: an integrated platform for visualization and analysis of high-throughput sequence-based experimental data. *Bioinformatics* 28(4):464-9.

## Additional authors

The following are additional authors from the EuSCAPE working group:

Andi Koraqi<sup>1</sup>, Denada Lacey<sup>1</sup>, Petra Apfalter<sup>2</sup>, Rainer Hartl<sup>2</sup>, Youri Glupczynski<sup>3</sup>, Te-Din Huang<sup>3</sup>, Tanya Strateva<sup>4</sup>, Yuliya Marteva-Proevska<sup>5</sup>, Arjana Tambic Andrasevic<sup>6</sup>, Iva Butic<sup>6</sup>, Despo Pieridou-Bagatzouni<sup>7</sup>, Panagiota Maikanti-Charalampous<sup>7</sup>, Jaroslav Hrabak<sup>8</sup>, Helena Zemlickova<sup>9</sup>, Anette Hammerum<sup>10</sup>, Lotte Jakobsen<sup>10</sup>, Marina Ivanova<sup>11</sup>, Anastasia Pavelkovich<sup>11</sup>, Jari Jalava<sup>12</sup>, Monica Österblad<sup>12</sup>, Laurent Dortet<sup>13</sup>, Sophie Vaux<sup>14</sup>, Martin Kaase<sup>15</sup>, Sören G. Gatermann<sup>16</sup>, Alkiviadis Vatopoulos<sup>17</sup>, Kyriaki Tryfinopoulou<sup>17</sup>, Ákos Tóth<sup>18</sup>, Laura Jánvári<sup>18</sup>, Teck Wee Boo<sup>19</sup>, Elaine McGrath<sup>19</sup>, Yehuda Carmeli<sup>20</sup>, Amos Adler<sup>20</sup>, Annalisa Pantosti<sup>21</sup>, Monica Monaco<sup>21</sup>, Lul Raka<sup>22</sup>, Arsim Kurti<sup>22</sup>, Arta Balode<sup>23</sup>, Mara Saule<sup>23</sup>, Jolanta Miciuleviciene<sup>24</sup>, Aiste Mierauskaite<sup>24</sup>, Monique Perrin-Weniger<sup>25</sup>, Paul Reichert<sup>25</sup>, Nina Nestorova<sup>26</sup>, Sonia Debattista<sup>26</sup>, Gordana Mijovic<sup>27</sup>, Milena Lopivic<sup>27</sup>, Ørjan Samuelsen<sup>28</sup>, Bjørg Haldorsen<sup>28</sup>, Dorota Żabicka<sup>29</sup>, Elżbieta Literacka<sup>30</sup>, Manuela Caniça<sup>31</sup>, Vera Manageiro<sup>31</sup>, Ana Kaftandzieva<sup>32</sup>, Elena Trajkovska-Dokic<sup>32</sup>, Maria Damian<sup>33</sup>, Brandusa Lixandru<sup>33</sup>, Zora Jelesic<sup>34</sup>, Anika Trudic<sup>35</sup>, Milan Niks<sup>36</sup>, Eva Schreterova<sup>37</sup>, Mateja Pirs<sup>38</sup>, Tjasa Cerar<sup>38</sup>, Jesús Oteo-Iglesias<sup>39</sup>, María Pérez-Vázquez<sup>39</sup>, Christian Giske<sup>40</sup>, Karin Sjöström<sup>41</sup>, Deniz Gür<sup>42</sup>, Aslı Cakar<sup>42</sup>, Neil Woodford<sup>43</sup>, Katie Hopkins<sup>43</sup>, Camilla Wiuff<sup>44</sup>, Derek J. Brown<sup>45</sup>.

<sup>1</sup>University Hospital Center "Mother Theresa", Tirana, Albania. <sup>2</sup>Elisabethinen Hospital Linz, Linz, Austria. <sup>3</sup>CHU Dinant-Godinne UCL Namur, Namur, Belgium. <sup>4</sup>Faculty of Medicine, Medical University of Sofia, Sofia, Bulgaria. <sup>5</sup>Alexandrovska University Hospital, Sofia, Bulgaria. <sup>6</sup>University Hospital for Infectious Diseases, Zagreb, Croatia. <sup>7</sup>Nicosia General Hospital, Nicosia, Cyprus. <sup>8</sup>Faculty of Medicine in Plzen, Charles University in Prague, Plzen, Czech Republic. <sup>9</sup>National Institute of Public Health, Praha, Czech Republic. <sup>10</sup>Statens Serum Institut, Copenhagen, Denmark. <sup>11</sup>East Tallinn Central Hospital, Tallinn, Estonia. <sup>12</sup>National Institute for Health and Welfare, Turku, Finland. <sup>13</sup>Bicêtre Hospital, Le Kremlin-Bicêtre, France. <sup>14</sup>Institut de Veille Sanitaire, Saint-Maurice, France. <sup>15</sup>Universitätsmedizin Göttingen, Göttingen, Germany. <sup>16</sup>Ruhr-University Bochum, Bochum, Germany. <sup>17</sup>National School of Public Health, Athens, Greece. <sup>18</sup>National Center for Epidemiology, Budapest,

Hungary. <sup>19</sup>Galway University Hospitals, Galway, Ireland. <sup>20</sup>Ministry of Health, Tel-Aviv, Israel. <sup>21</sup>Istituto Superiore di Sanità, Rome, Italy. <sup>22</sup>National Institute of Public Health of Kosovo, Prishtina, Kosovo. <sup>23</sup>Pauls Stradins Clinical University Hospital, Riga, Latvia. <sup>24</sup>National Public Health Surveillance Laboratory, Vilnius, Lithuania. <sup>25</sup>Laboratoire National De Sante, D udelingen, Luxembourg. <sup>26</sup>Mater Dei Hospital, Msida, Malta. <sup>27</sup>Institute of Public Health, Podgorica, Montenegro. <sup>28</sup>University Hospital of North Norway, Troms , Norway. <sup>29</sup>Narodowy Instytut Lekow, Warsaw, Poland. <sup>30</sup>National Medicines Institute, Warsaw, Poland. <sup>31</sup>National Institute of Health Dr. Ricardo Jorge, Lisbon, Portugal. <sup>32</sup>Institute of Microbiology and Parasitology, Medical Faculty, Skopje, Republic of Macedonia. <sup>33</sup>Cantacuzino National Research Institute, Bucharest, Romania. <sup>34</sup>Institute for Public Health of Vojvodina, Novi Sad, Serbia. <sup>35</sup>Institute for Pulmonary Diseases of Vojvodina, Sremska Kamenica, Serbia. <sup>36</sup>Public Health Authority of the Slovak Republic, Bratislava, Slovakia. <sup>37</sup>University Hospital of P.J.Safarik, Kosice, Slovakia. <sup>38</sup>Institute of Microbiology and Immunology, Ljubljana, Slovenia. <sup>39</sup>Centro Nacional de Microbiolog a, Instituto de Salud Carlos III, Madrid, Spain. <sup>40</sup>Karolinska Institutet, Stockholm, Sweden. <sup>41</sup>Public Health Agency of Sweden, Stockholm, Sweden. <sup>42</sup>Hacettepe University, Ankara, Turkey. <sup>43</sup>National Infection Service, Public Health England, London, United Kingdom - England and Northern Ireland. <sup>44</sup>Sydvestjysk Hospital, Esbjerg, Denmark. <sup>45</sup>Scottish Microbiology Reference Laboratories, Glasgow, United Kingdom - Scotland.

The following are additional authors from the ESCMID Study Group for Epidemiological Markers (ESGEM):

Guido Werner<sup>1</sup>, Natacha Couto<sup>2</sup>

<sup>1</sup>Department of Infectious Diseases, Robert Koch Institut Wernigerode, Wernigerode, Germany, <sup>2</sup>Milner Centre for Evolution, University of Bath, Bath, UK
